# Supplementary material for: SnO2–carbon–RGO heterogeneous electrode materials with enhanced anode performances in lithium ion batteries
Source: Royal Society of Chemistry journal article supplement (doi:10.1039/c2jm13706b), 2012-01-01
Supplement: c2jm13706b.pdf [file c2jm13706b.pdf]

Electronic Supplementary Information (ESI) for

## **SnO<sub>2</sub>-Carbon-RGO Materials with Enhanced Anode Performances in Lithium Ion Batteries**

**Baojun Li,<sup>a</sup> Huaqiang Cao,<sup>\*a</sup> Jingxian Zhang,<sup>b</sup> Meizhen Qu,<sup>b</sup> Fang Lian,<sup>c</sup> Xianghua Kong<sup>c</sup>**

<sup>a</sup> *Department of Chemistry, Tsinghua University, Beijing 100084, P R China*

<sup>b</sup> *Chengdu Institute of Organic Chemistry, Chinese Academy of Sciences, Chengdu 610041, P R China*

<sup>c</sup> *School of Materials Science and Engineering, University of Science & Technology Beijing, Beijing 100083, P R China*

\*Corresponding author. E-mail: hqcao@mail.tsinghua.edu.cn

### **Experimental Section**

*Preparation of SCG:* Graphite oxide was prepared from purified natural graphite according to Hummers method reported in Ref. [S1, S2]. Graphite oxide (100 mg) and water (200 mL) was ultrasonicated for 2 h. An aqueous solution (50 mL) of SnCl<sub>4</sub> (3506 mg) and Polyvinylpyrrolidone (PVP, MW= 40000, 150 mg) were added to the aqueous suspension. The mixture was stirred for 4 h to complete ion-exchange. Aqueous solution (20 mL) of Glucose (1500 mg) and Urotropine (1671 mg, 1.0 equ.) was added into the above mixture. The mixture was kept stirring for a further 1 h and then transferred into an autoclave (500 mL) and then heated to 200 °C for 48 h. After cooled to room temperature naturally, the resulted solid was washed with water and dyied at 140 °C. After calcined to 500 °C with a heating rate of 10 °C/min in Ar flow, SCG was obtained.

*Characterization:* Fourier transform infrared (FT-IR) spectra measurements were carried out on a NICOLET 560 Fourier transform infrared spectrophotometer. Raman spectrum was recorded on a Renishaw RM-1000 with excitation from the 514 nm line of an Ar-ion laser with a power of about 5 mW. The phase structure of as-prepared products were characterized with X-ray diffraction (XRD, Bruker D8 advance) with Cu K $\alpha$   $\lambda$ =1.5418 Å). X-ray photoelectron spectrum (XPS) were recorded on a PHI quantera SXM spectrometer with an Al K $\alpha$  = 280.00 eV excitation source, where binding energies were calibrated by referencing the C1s peak (284.8 eV) to reduce the sample charge effect. The morphology of as-prepared products was studied by using transmission electron microscope (TEM, Hitachi H-7650B, operating at 80.0 kV) and high resolution TEM (HRTEM, JEOL JEM-2010F electron microscope, operating at 200 kV). For atom force microscopy (AFM) measurement, the samples were coated on Si surface and AFM studies were performed using a Digital Instruments Dimension 3100 microscope in the tapping mode. N<sub>2</sub> adsorption-desorption was tested on TriStar II 3020 (Micromeritics Instrument Corporation, USA). The current-voltage (*I*-*V*) curves were obtained at the Shanghai Chenhua CHI660B type electrochemical working station using the compressed pellets with a diameter of 12.5 mm, which were produced in a stainless steel mould with 12 MPa pressure from 115 mg of SCG, and SnO<sub>2</sub> samples, respectively.

Lithium ion batteries (LIBs) performance was determined using CR 2032 type coin cells assembled in an argon-filled glove box (MBRAUN). The working electrodes prepared by mixing the SCG and Carboxymethyl Cellulose Sodium (CMC, 3 wt. %) at a weight ratio of 90:10 were pasted on pure Cu foil (15  $\mu\text{m}$ ). Celgard 2400 was used as a separator. Lithium foil was used as the counter electrode. The electrolyte consisted of a solution of  $\text{LiPF}_6$  (1 M) containing vinylene carbonate (2 wt. %) in ethylene carbonate/dimethyl carbonate/diethyl carbonate (1:1:1, volume ratio). A galvanostatic cycling test of the assembled cells was carried out on a BS-9300K system in the voltage range of 0.001–3.0 V (vs.  $\text{Li}^+/\text{Li}$ ) at current density of 0.2 C (200  $\text{mA g}^{-1}$ ), 0.5 C, 1.0 C, 2.0 C, and 5.0 C, respectively. The weight of SCG in the working electrode was used to estimate the specific discharge capacity of the battery, which was expressed in  $\text{mA hg}^{-1}$  of SCG.

## References

[S1] W. S. Hummers and R. E. Offeman, *J. Am. Chem. Soc.*, 1958, **80**, 1339–1339.

[S2] B. J. Li and H. Q. Cao, *J. Mater. Chem.*, 2011, **21**, 3346–3349.

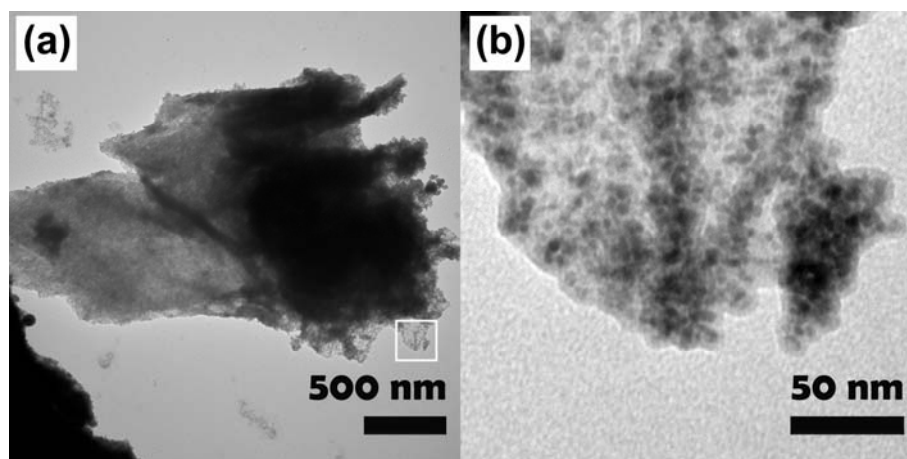

**Figure S1** TEM images of SCG (Hitachi H-7650B operating at 80.0 kV).

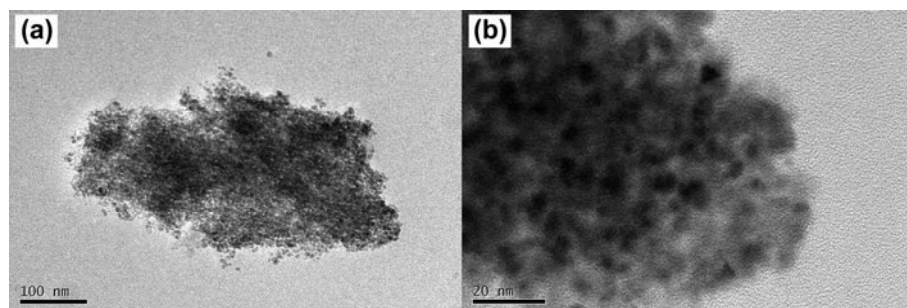

**Figure S2** HRTEM images of SCG (JEOL JEM-2010F electron microscope operating at 200 kV).

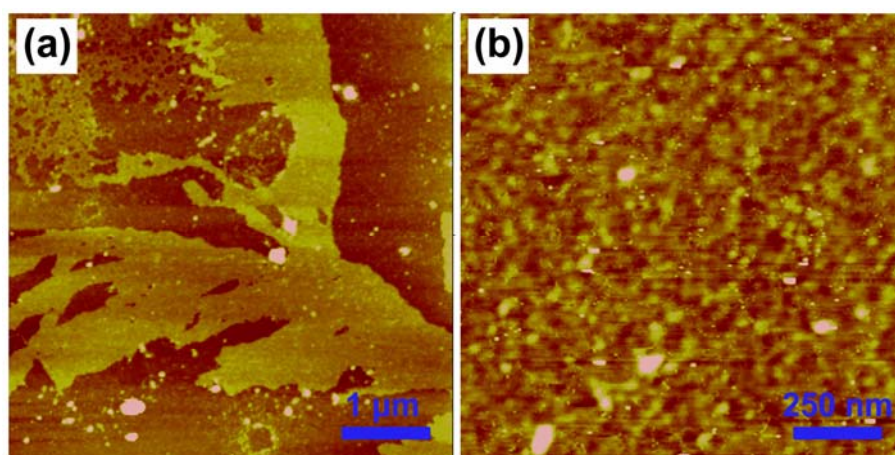

**Figure S3** (a) AFM images of SCG.

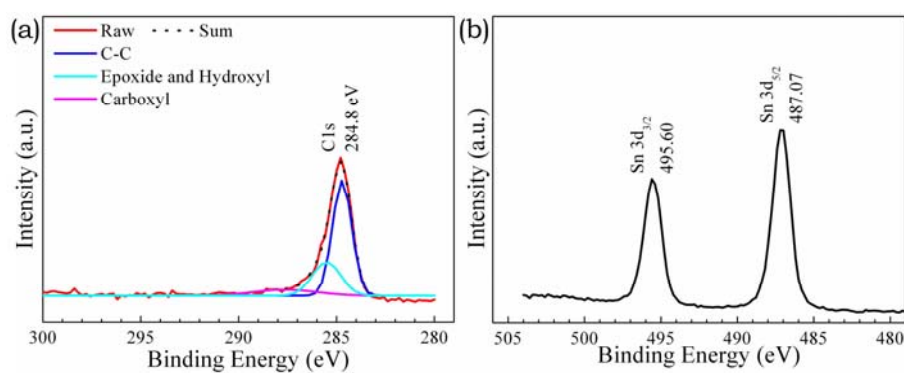

**Figure S4** The fine scanning XPS spectra of (a) C1s, and (b) Sn3d.

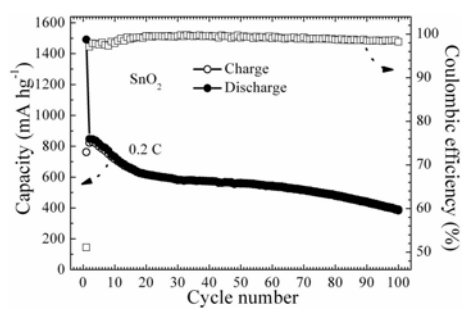

**Figure S5** Cyclic performances of electrode fabricated with SnO<sub>2</sub> at current rate of 0.2 C.

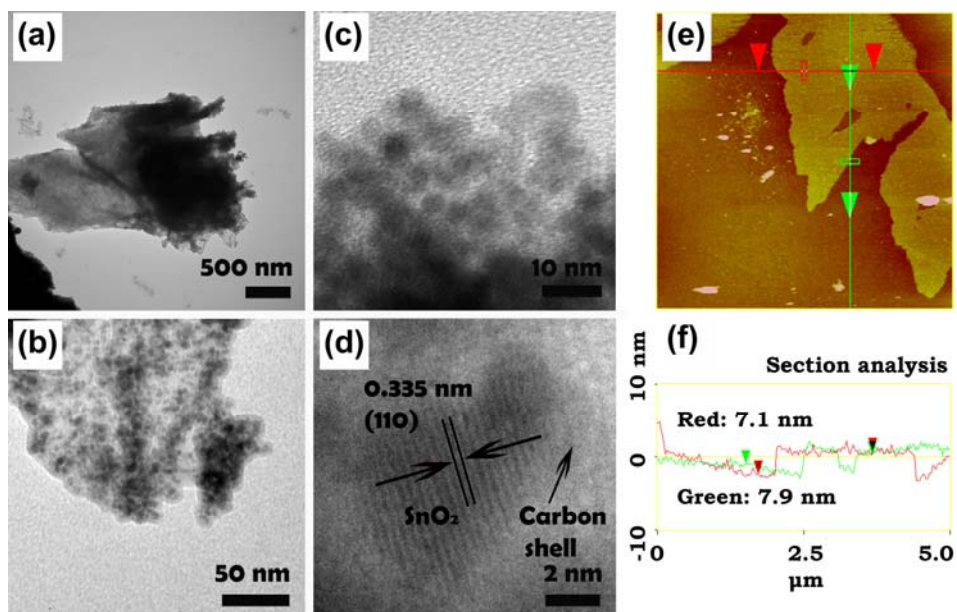

**Figure S6** The enlarged version of (a, b) TEM images, (c, d) HRTEM images, (e) AFM image of SCG, and (f) its section analysis.

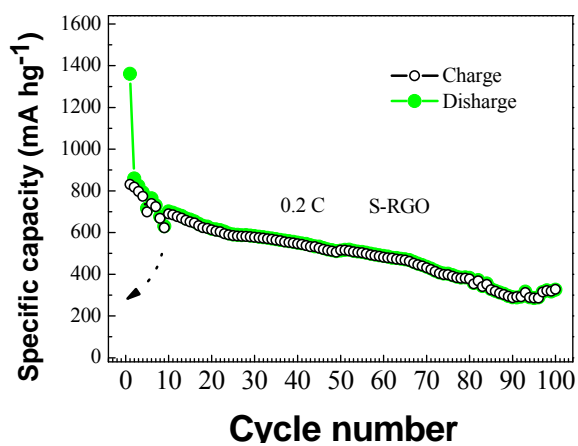

**Figure S7** The cyclic performances of electrodes fabricated by SnO<sub>2</sub> nanoparticles anchored on RGO sheets without the carbon encapsulating layer (i.e., S-RGO) at current rate of 0.2 C.
